# Supplementary material for: Chemical Constituents of the Leaves of Butterbur (Petasites japonicus) and Their Anti-Inflammatory Effects
Source: PubMed Central journal article supplement (PMC6995602; doi:10.3390/biom9120806), 2019-11-29
Supplement: biomolecules-09-00806-s001.pdf [file biomolecules-09-00806-s001.pdf]

# Chemical Constituents of the Leaves of Butterbur (*Petasites japonicus*) and their Anti-Inflammatory Effects

## Content

### General Experimental Procedures

**Figure S1.** HR-ESI-MS spectrum of compound 1

**Figure S2.** The  $^1\text{H}$ -NMR (500 MHz,  $\text{CD}_3\text{COCD}_3$ ) spectrum of compound 1

**Figure S3.** The  $^{13}\text{C}$ -NMR (125 MHz,  $\text{CD}_3\text{COCD}_3$ ) spectrum of compound 1

**Figure S4.** The HSQC spectrum of compound 1 in  $\text{CD}_3\text{COCD}_3$

**Figure S5.** The COSY spectrum of compound 1 in  $\text{CD}_3\text{COCD}_3$

**Figure S6.** The HMBC spectrum of compound 1 in  $\text{CD}_3\text{COCD}_3$

**Figure S7.** The NOESY spectrum of compound 1 in  $\text{CD}_3\text{COCD}_3$

**Figure S8.** HR-ESI-MS spectrum of compound 2

**Figure S9.** The  $^1\text{H}$ -NMR (500 MHz,  $\text{CD}_3\text{OD}$ ) spectrum of compound 2

**Figure S10.** The  $^{13}\text{C}$ -NMR (125 MHz,  $\text{CD}_3\text{OD}$ ) spectrum of compound 2

**Figure S11.** The HSQC spectrum of compound 2 in  $\text{CD}_3\text{OD}$

**Figure S12.** The COSY spectrum of compound 2 in  $\text{CD}_3\text{OD}$

**Figure S13.** The HMBC spectrum of compound 2 in  $\text{CD}_3\text{OD}$

**Figure S14.** The NOESY spectrum of compound 2 in  $\text{CD}_3\text{OD}$

**Figure S15.** Cell viability of the isolates from *P. japonicus*.

### General Experimental Procedures

Optical rotations and UV spectra were obtained on a JASCO P-2000 polarimeter (JASCO, Tokyo, Japan) and Optizen pop instrument (Mecasys, Daejeon, Korea), respectively. ECD and VCD spectra were measured with a J-2200 circular dichroism spectrophotometer (JASCO) and a ChiralIR-2X TM FT-VCD spectrometer (BioTools, Jupiter, FL, USA), respectively. ECD and VCD spectra were calculated by Spartan'14 (Wavefunction, Inc., Irvine, CA, USA; 2014) and Gaussian 09 (Revision E.01; Gaussian, Inc., Wallingford, CT, USA; 2009). IR spectra were obtained on an Agilent Cary 630 FTIR spectrometer (Agilent Technologies, Santa Clara, CA, USA). NMR and HRESIMS spectra were obtained using a JEOL 500 MHz (JEOL, Tokyo, Japan) and a Q-TOF micro mass spectrometer (Waters, Milford, MA, USA), respectively. TLC analysis was performed on Silica gel 60 F<sub>254</sub> (Merck, Kenilworth, NJ, USA) and RP-18 F<sub>254S</sub> (Merck) plates. Sephadex LH-20 (Amersham Pharmacia Biotech, Buckinghamshire, United Kingdom), Diaion HP-20 (Mitsubishi, Tokyo, Japan), and LiChroprep RP-18 (Merck, 40–63  $\mu\text{m}$ ) were used for column chromatography. MPLC and HPLC were performed using the flash purification system (Combi Flash Rf, Teledyne Isco, Lincoln, NE, USA) with Pre-packed cartridges, Redi Sep-C18 (13 g, 26 g, 43 g, 130 g, Teledyne Isco) and the Gilson purification system with a YMC Pack ODS-A column (250  $\times$  20.0 mm i.d., 5.0  $\mu\text{m}$ , YMC Co., Tokyo, Japan) and a Luna 10  $\mu\text{m}$  C18(2) 100A column (250  $\times$  21.2 mm i.d., 10.0  $\mu\text{m}$ , Phenomenex, Torrance, CA, USA), respectively. All solvents used for the chromatographic separations were distilled before use.

## Single Mass Analysis

Tolerance = 5.0 PPM / DBE: min = -1.5, max = 50.0

Selected filters: None

Monoisotopic Mass, Even Electron Ions

61 formula[e] evaluated with 1 results within limits (up to 50 best isotopic matches for each mass)

| Mass     | Calc. Mass | mDa | PPM | DBE  | Formula    | HFIT | C  | H  | O |
|----------|------------|-----|-----|------|------------|------|----|----|---|
| 325.0714 | 325.0712   | 0.2 | 0.6 | 12.5 | C18 H13 O6 | 29.2 | 18 | 13 | 6 |

Molecular formula : C<sub>18</sub>H<sub>14</sub>O<sub>6</sub>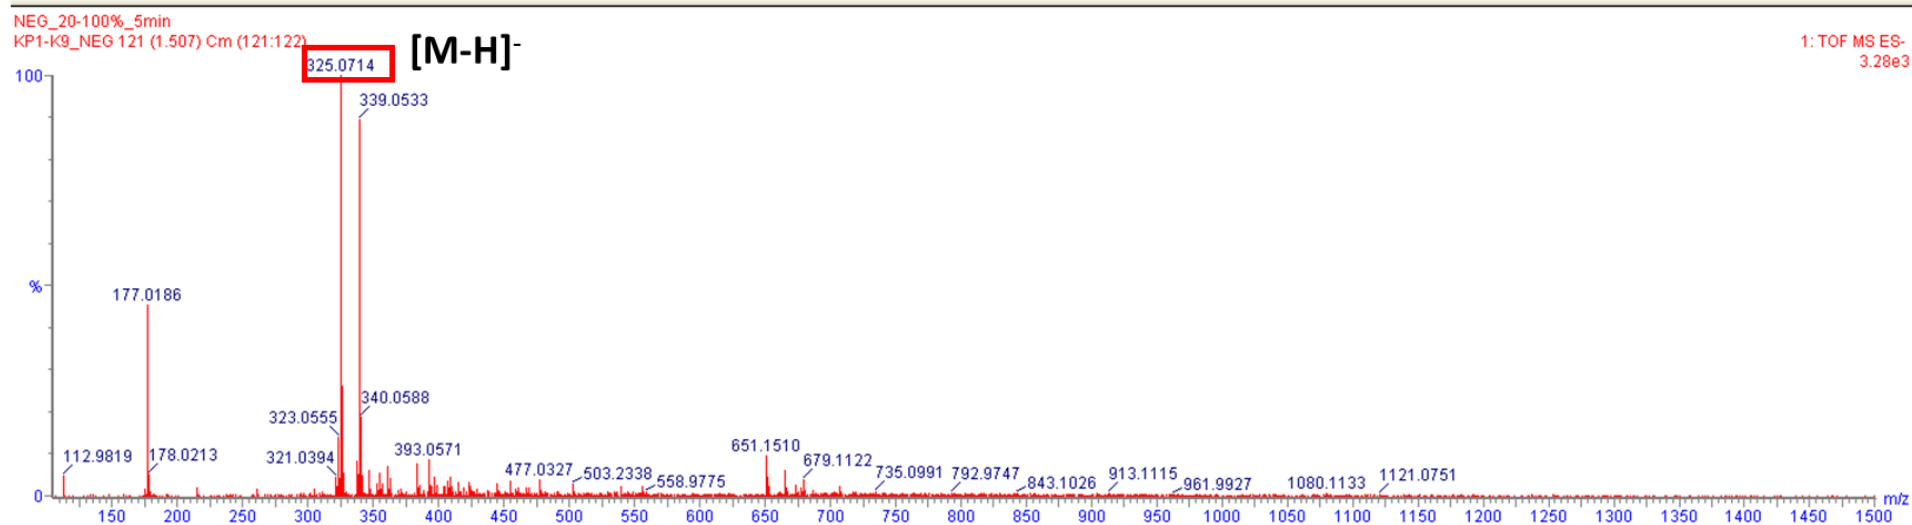

Figure S1. HR-ESI-MS spectrum of compound 1.

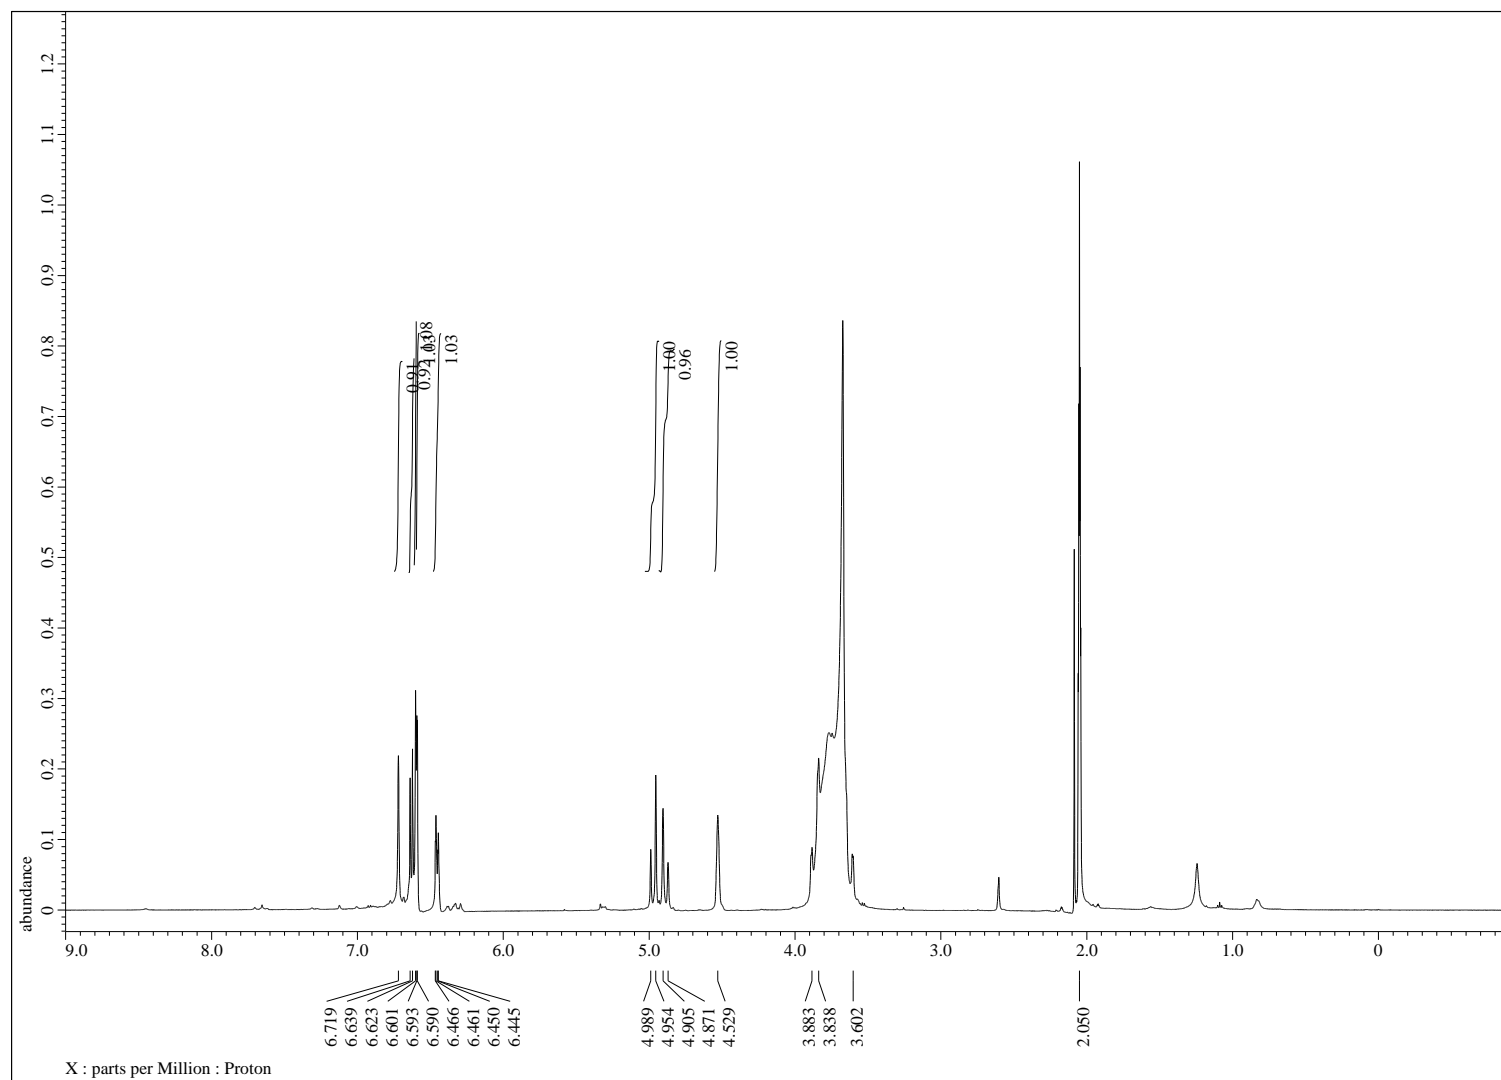

**Figure S2.** The  $^1\text{H-NMR}$  (500 MHz,  $\text{CD}_3\text{OCD}_3$ ) spectrum of compound **1**.

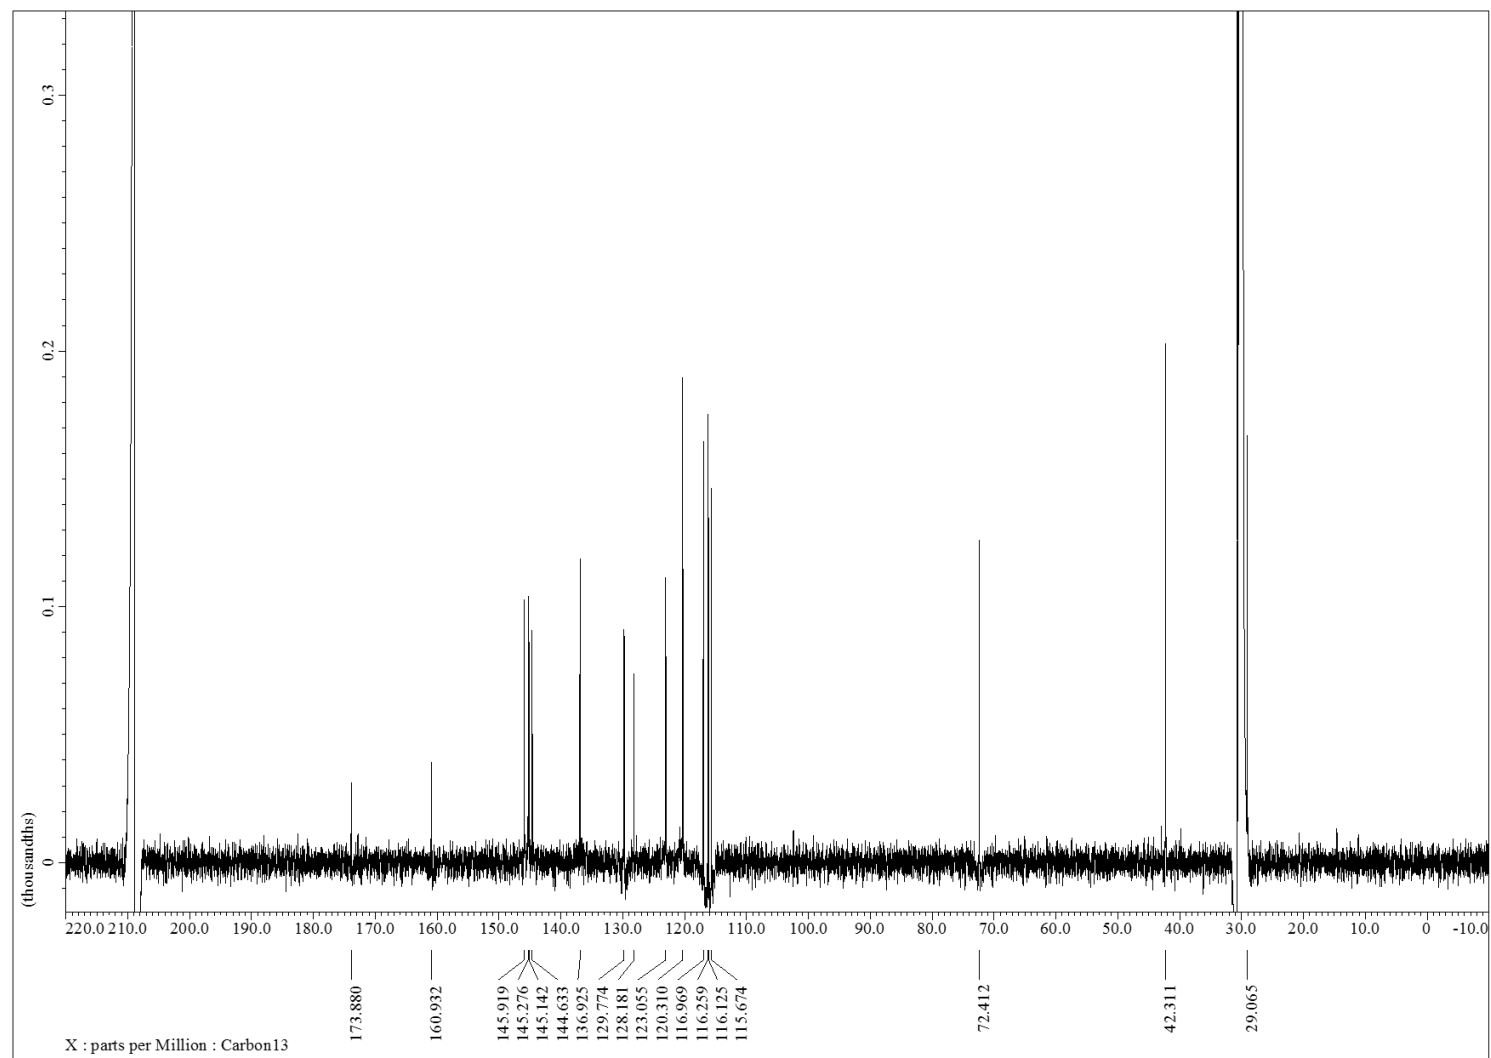

**Figure S3.** The  $^{13}\text{C}$ -NMR (125 MHz,  $\text{CD}_3\text{OCD}_3$ ) spectrum of compound 1.

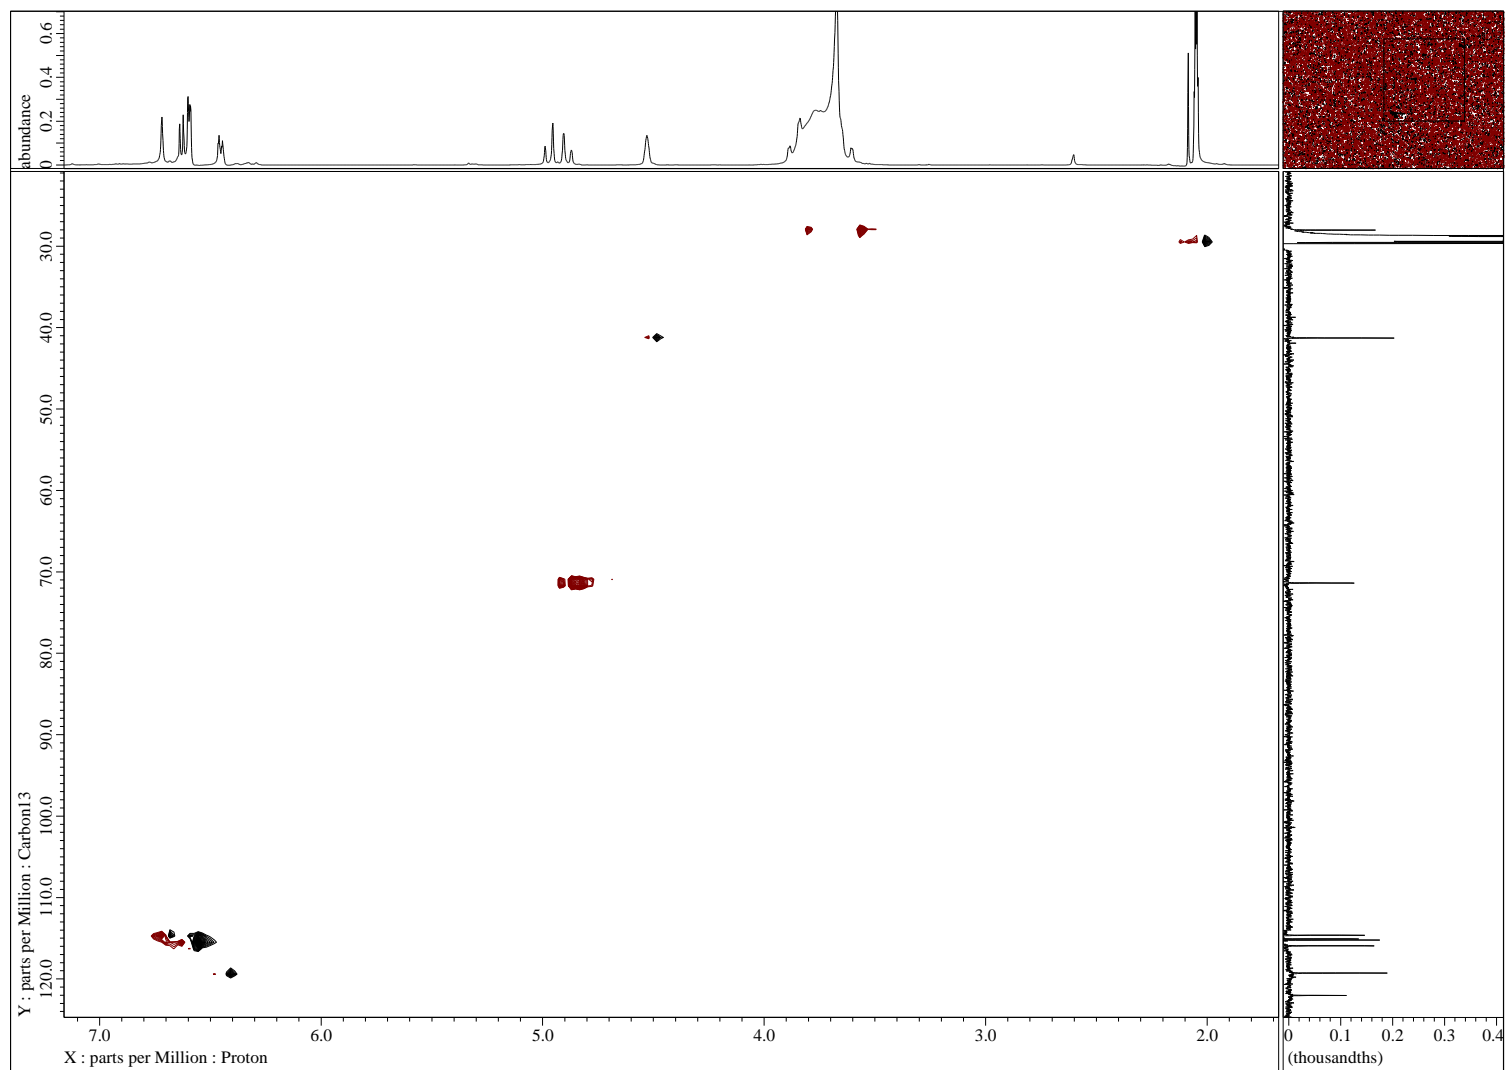

Figure S4. The HSQC spectrum of compound 1 in CD<sub>3</sub>OCD<sub>3</sub>.

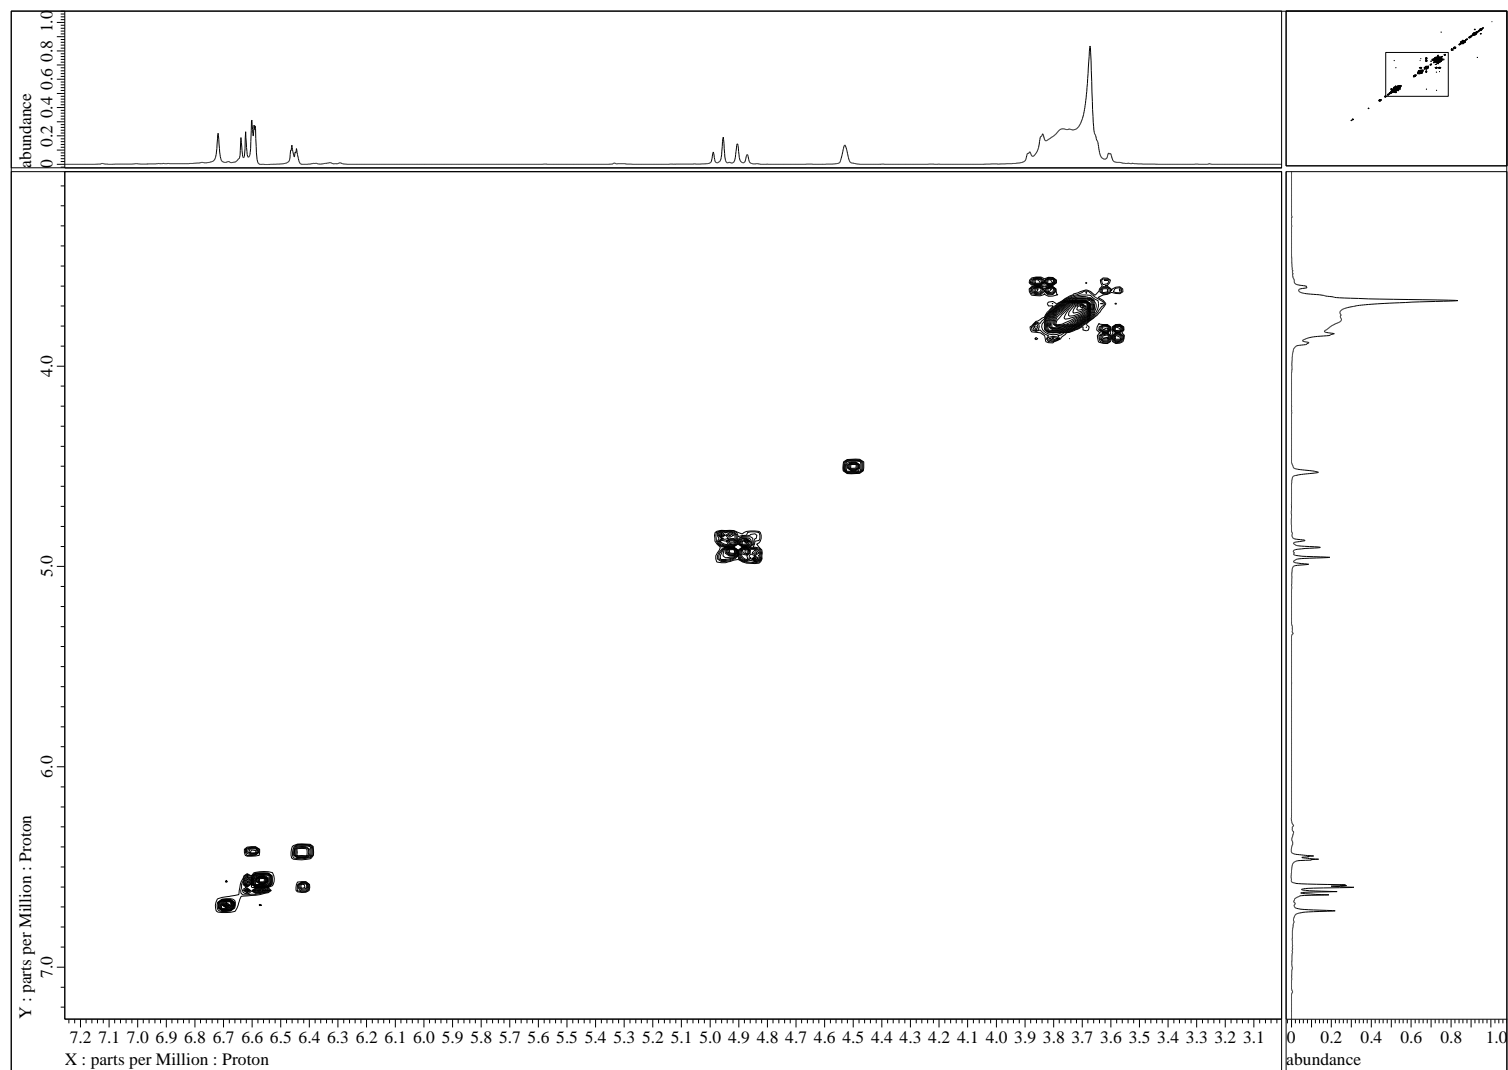

Figure S5. The COSY spectrum of compound 1 in CD<sub>3</sub>OCD<sub>3</sub>.

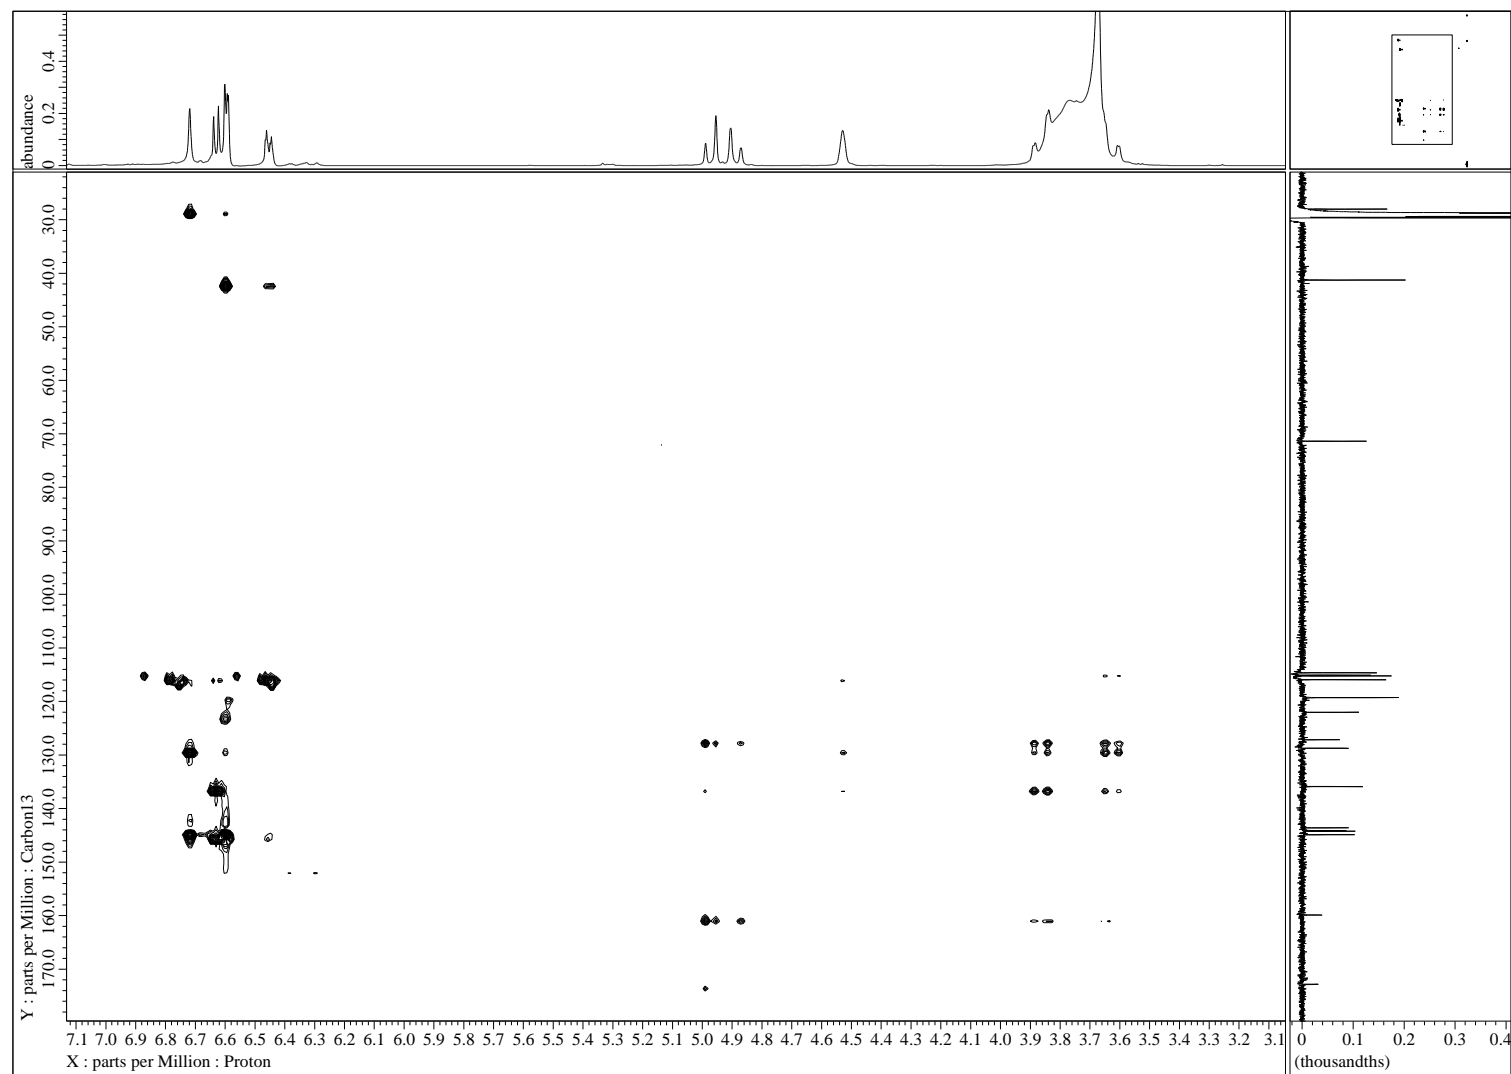

Figure S6. The HMBC spectrum of compound 1 in CD<sub>3</sub>OCD<sub>3</sub>.

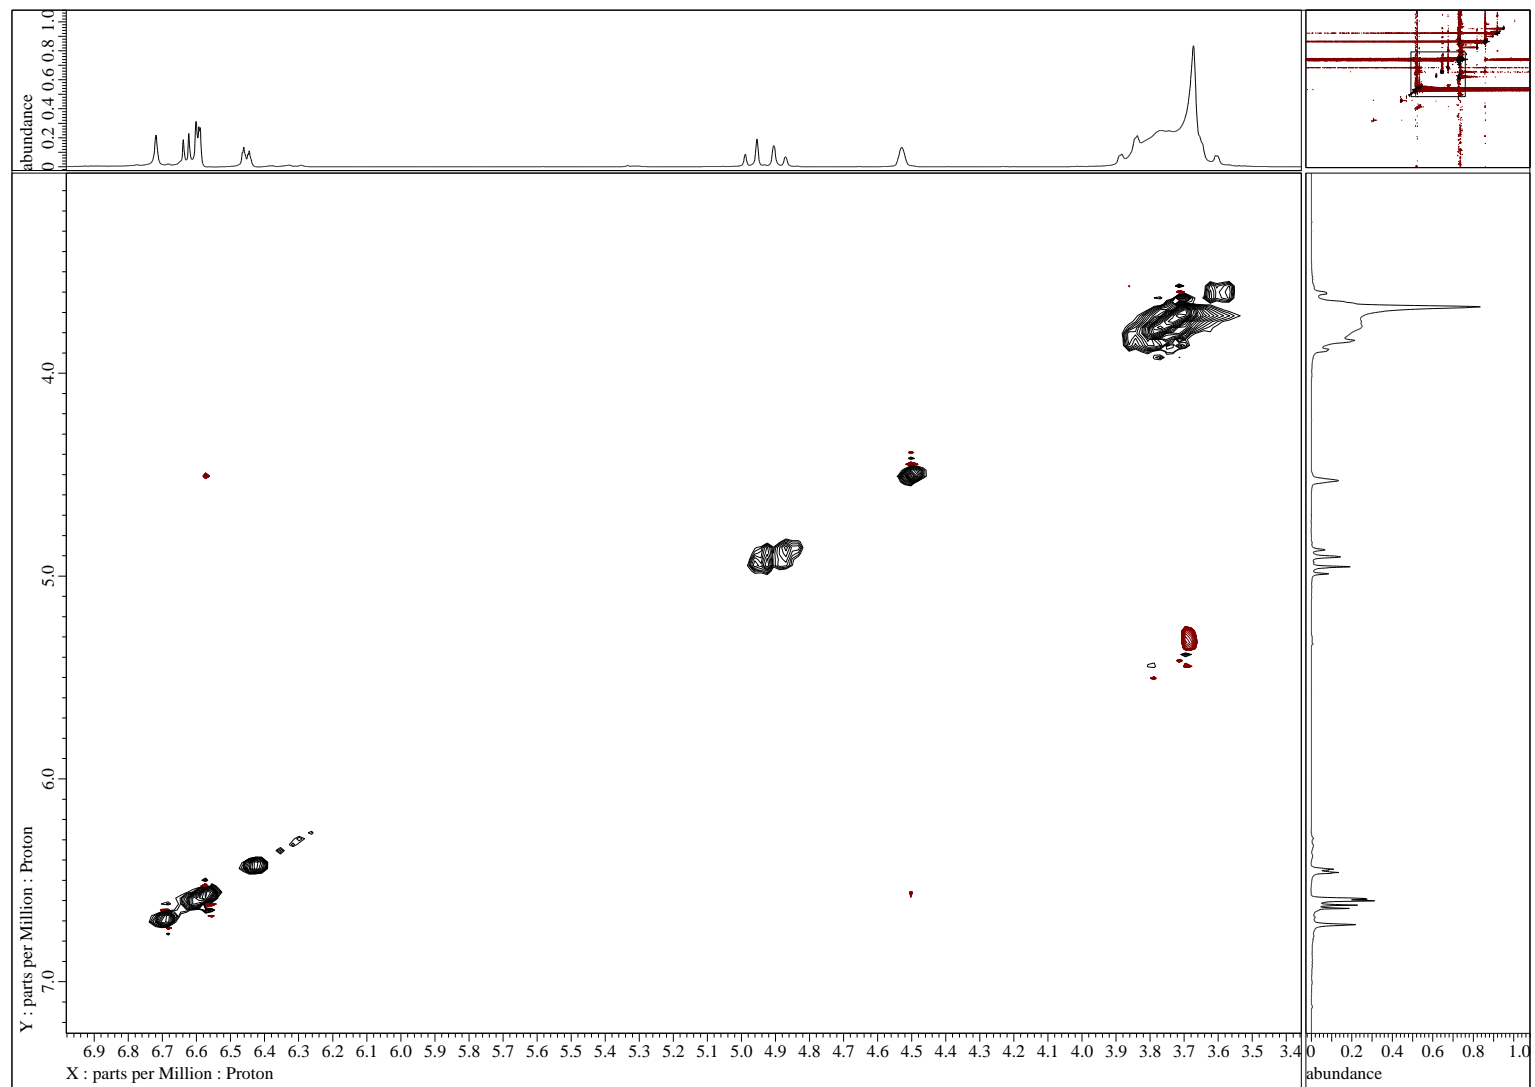

Figure S7. The NOESY spectrum of compound 1 in CD<sub>3</sub>OCD<sub>3</sub>.



## Single Mass Analysis

Tolerance = 5.0 PPM / DBE: min = -1.5, max = 50.0

Selected filters: None

Monoisotopic Mass, Even Electron Ions

70 formula[e] evaluated with 1 results within limits (up to 50 best isotopic matches for each mass)

| Mass     | Calc. Mass | mDa  | PPM  | DBE  | Formula    | i-FIT | C  | H  | O |
|----------|------------|------|------|------|------------|-------|----|----|---|
| 343.0810 | 343.0818   | -0.8 | -2.3 | 11.5 | C18 H15 O7 | 3.6   | 18 | 15 | 7 |

Molecular formula : C<sub>18</sub>H<sub>16</sub>O<sub>7</sub>

NEG\_20-100%\_5min

KP1-K4\_NEG 110 (1.361) Cm (110:111)

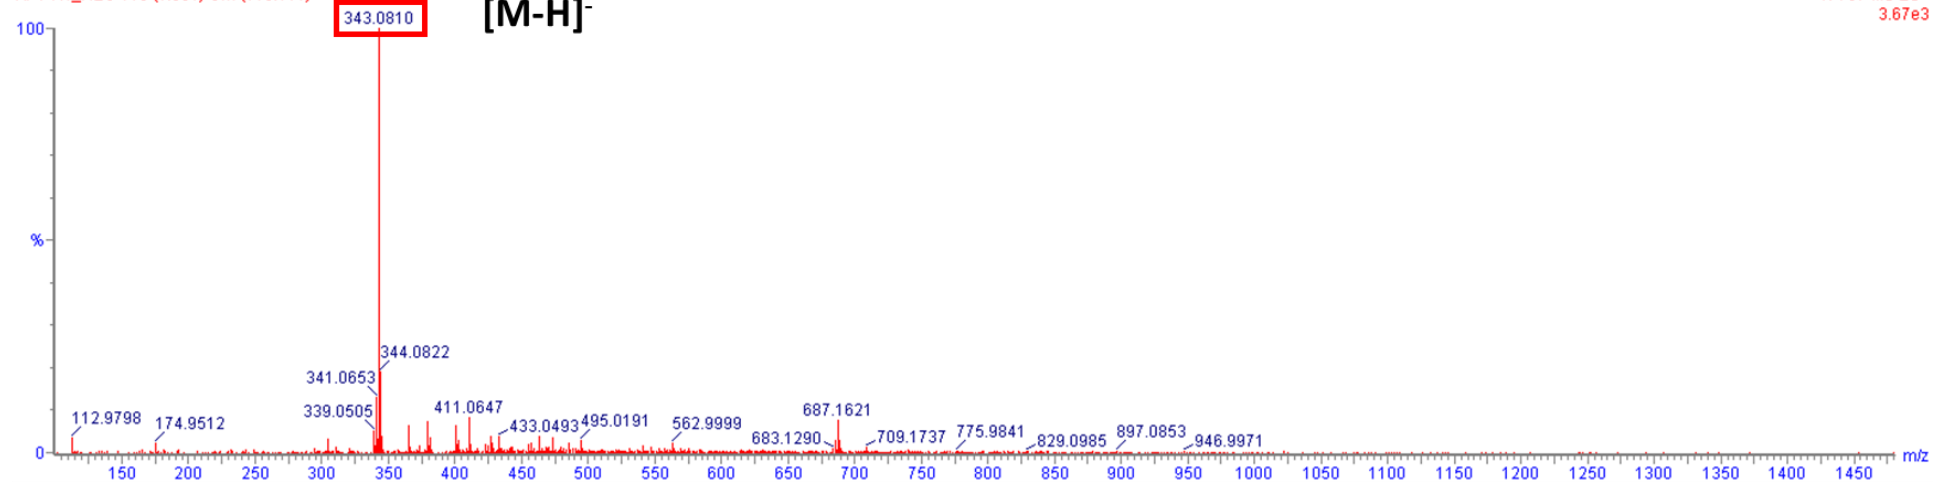

Figure S8. HR-ESI-MS spectrum of compound 2.

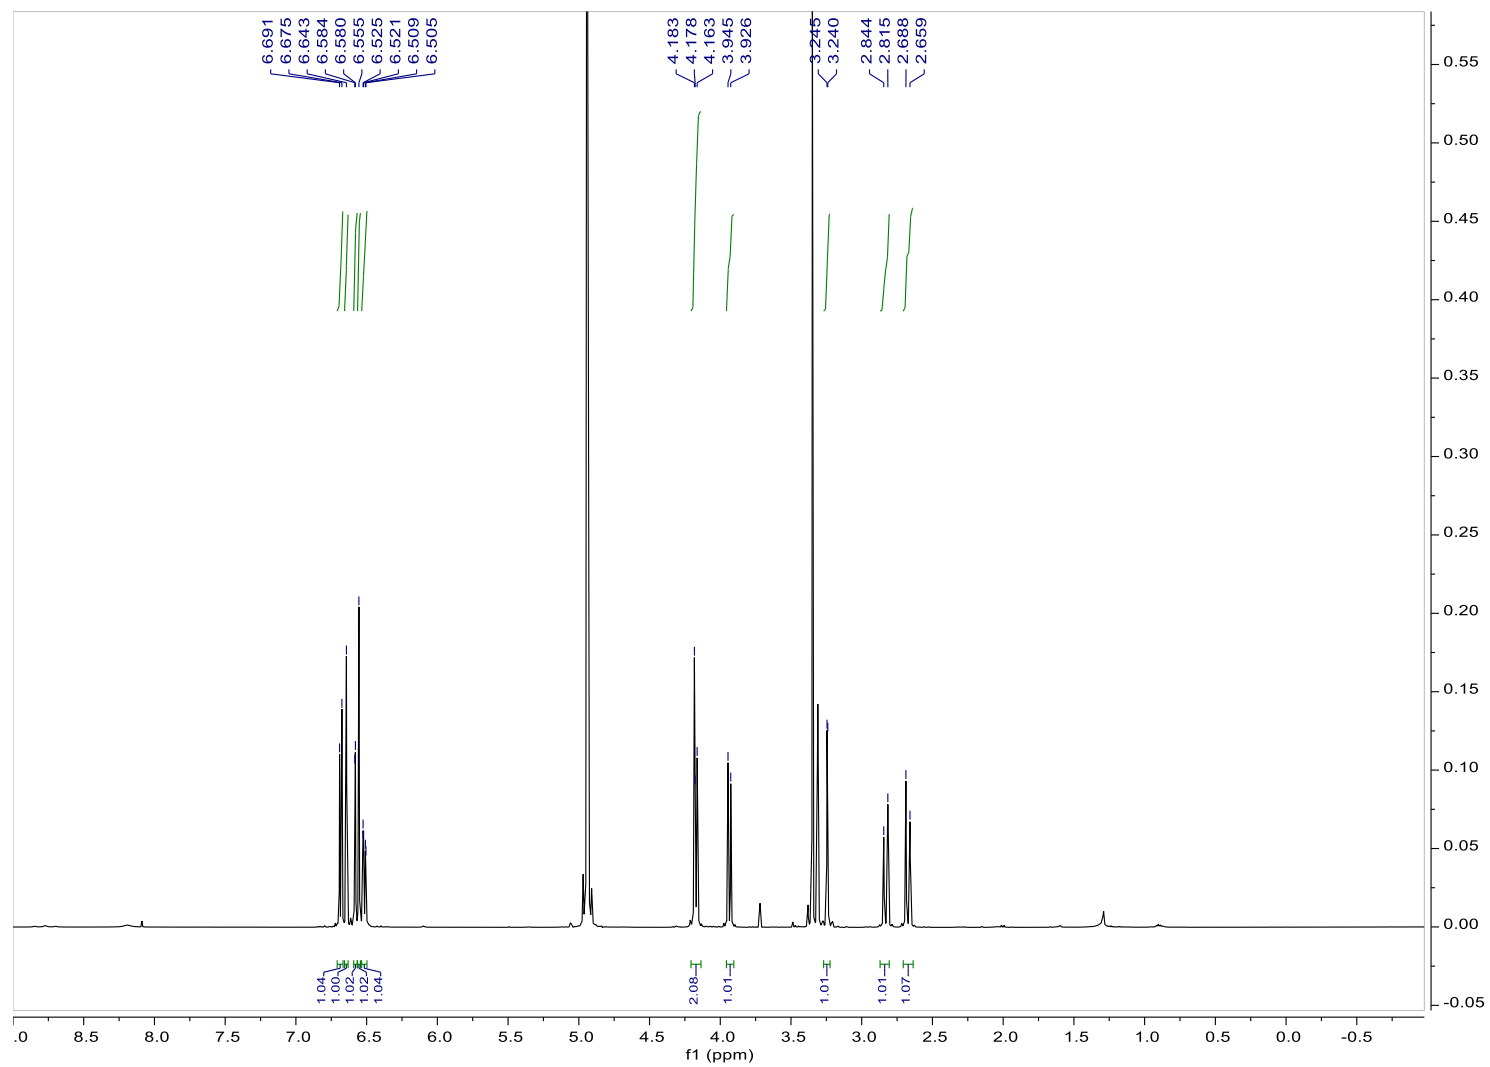

Figure S9. The <sup>1</sup>H-NMR (500 MHz, CD<sub>3</sub>OD) spectrum of compound 2.

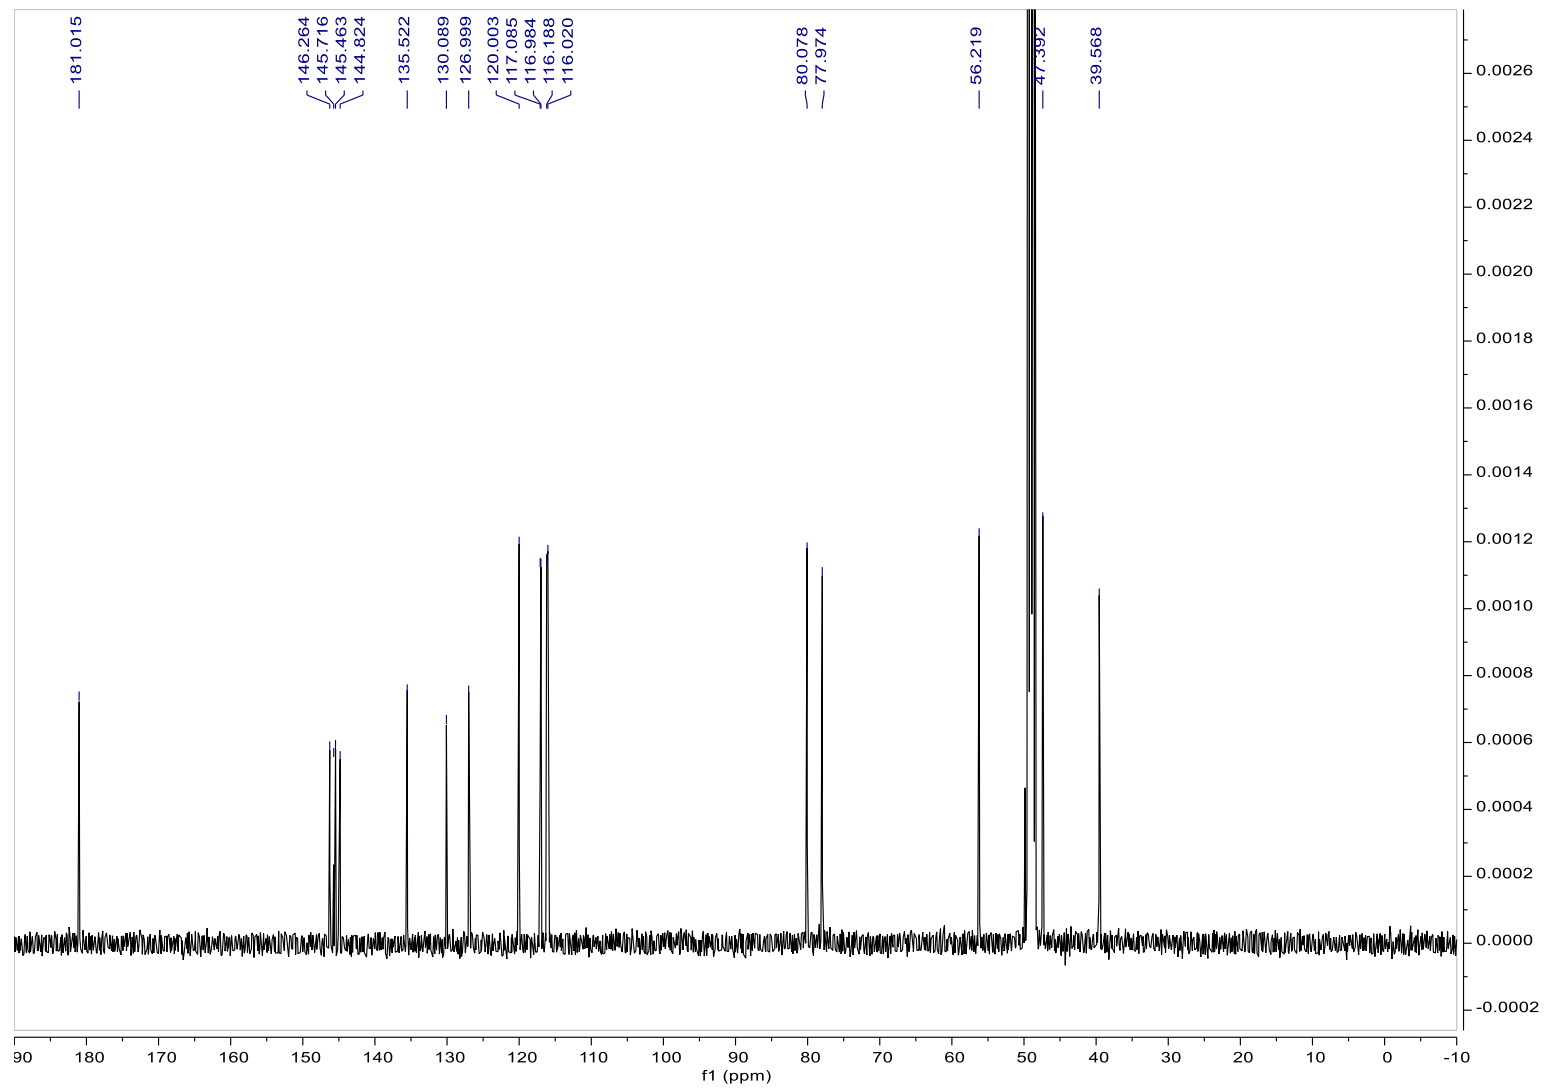

Figure S10. The  $^{13}\text{C}$ -NMR (125 MHz,  $\text{CD}_3\text{OD}$ ) spectrum of compound 2.

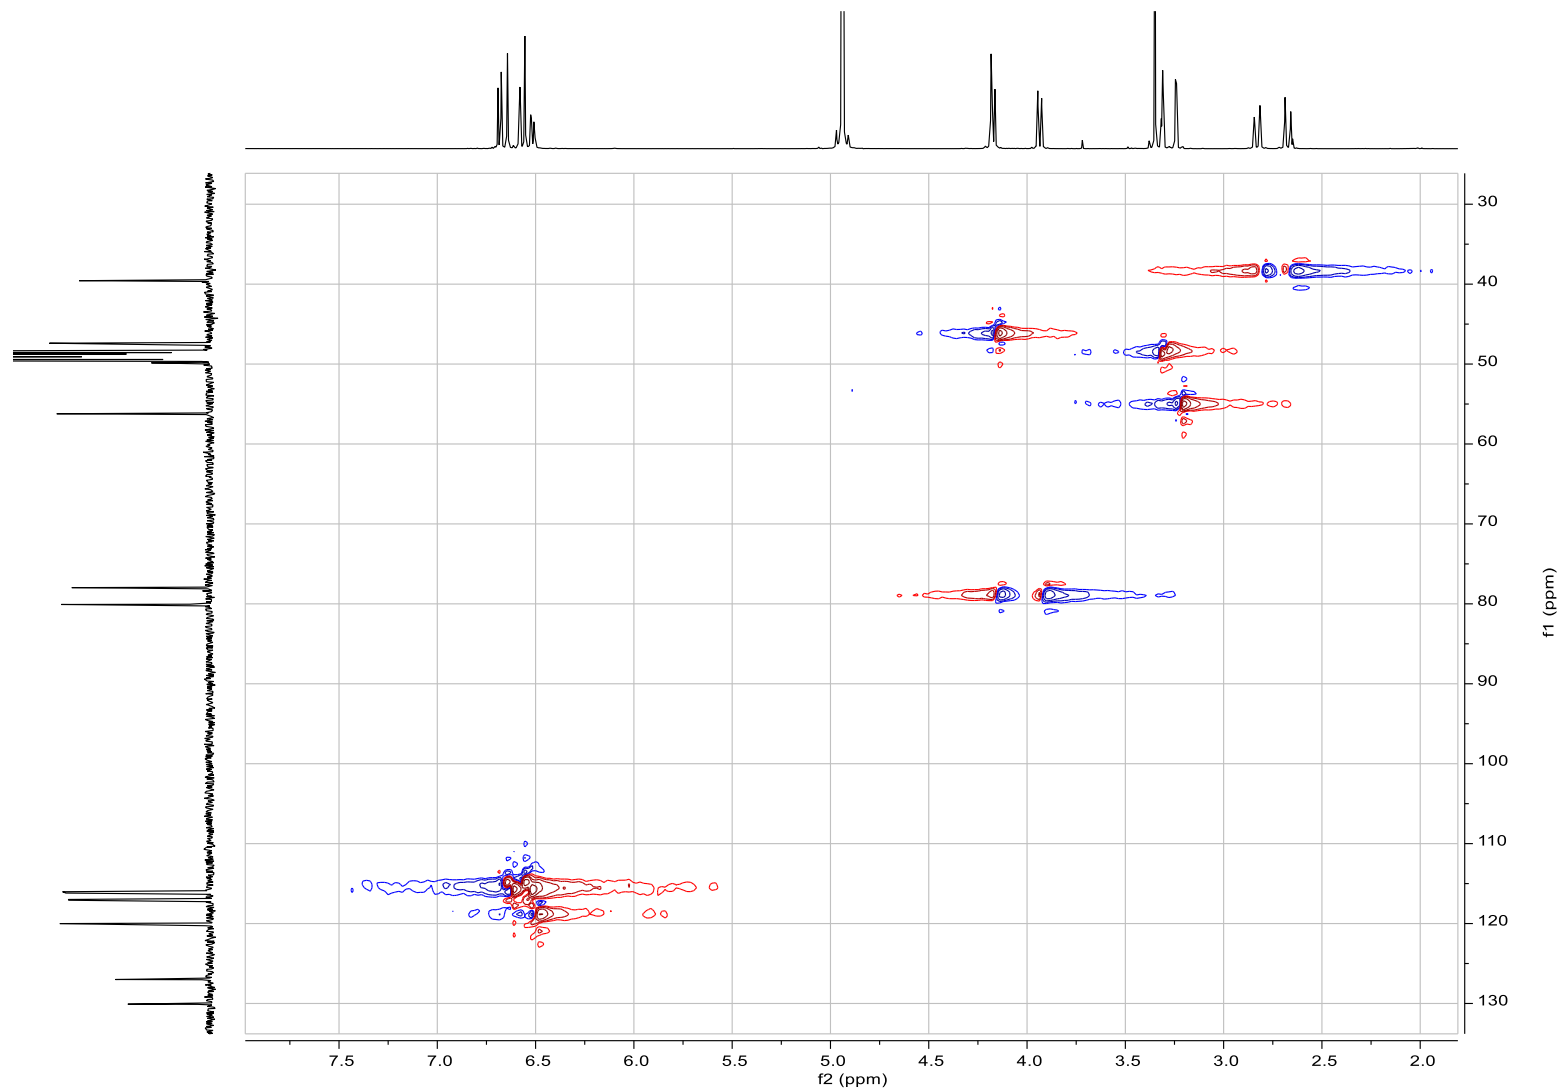

Figure S11. The HSQC spectrum of compound 2 in CD<sub>3</sub>OD.

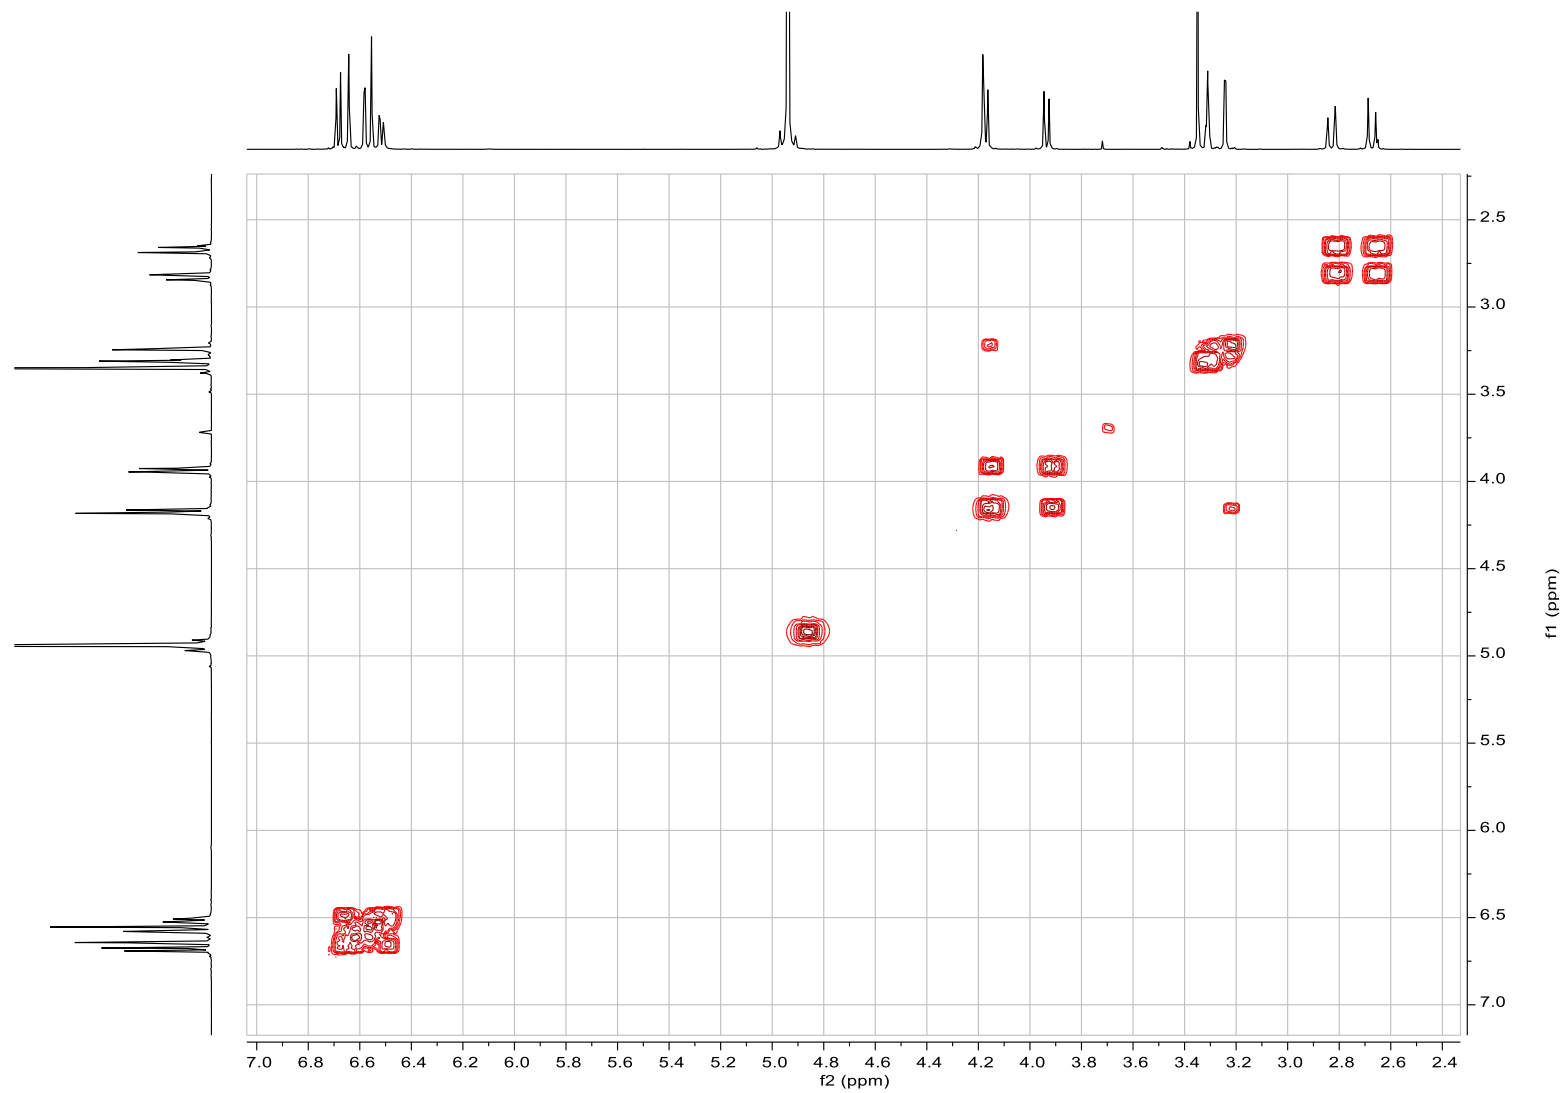

Figure S12. The COSY spectrum of compound 2 in CD<sub>3</sub>OD.

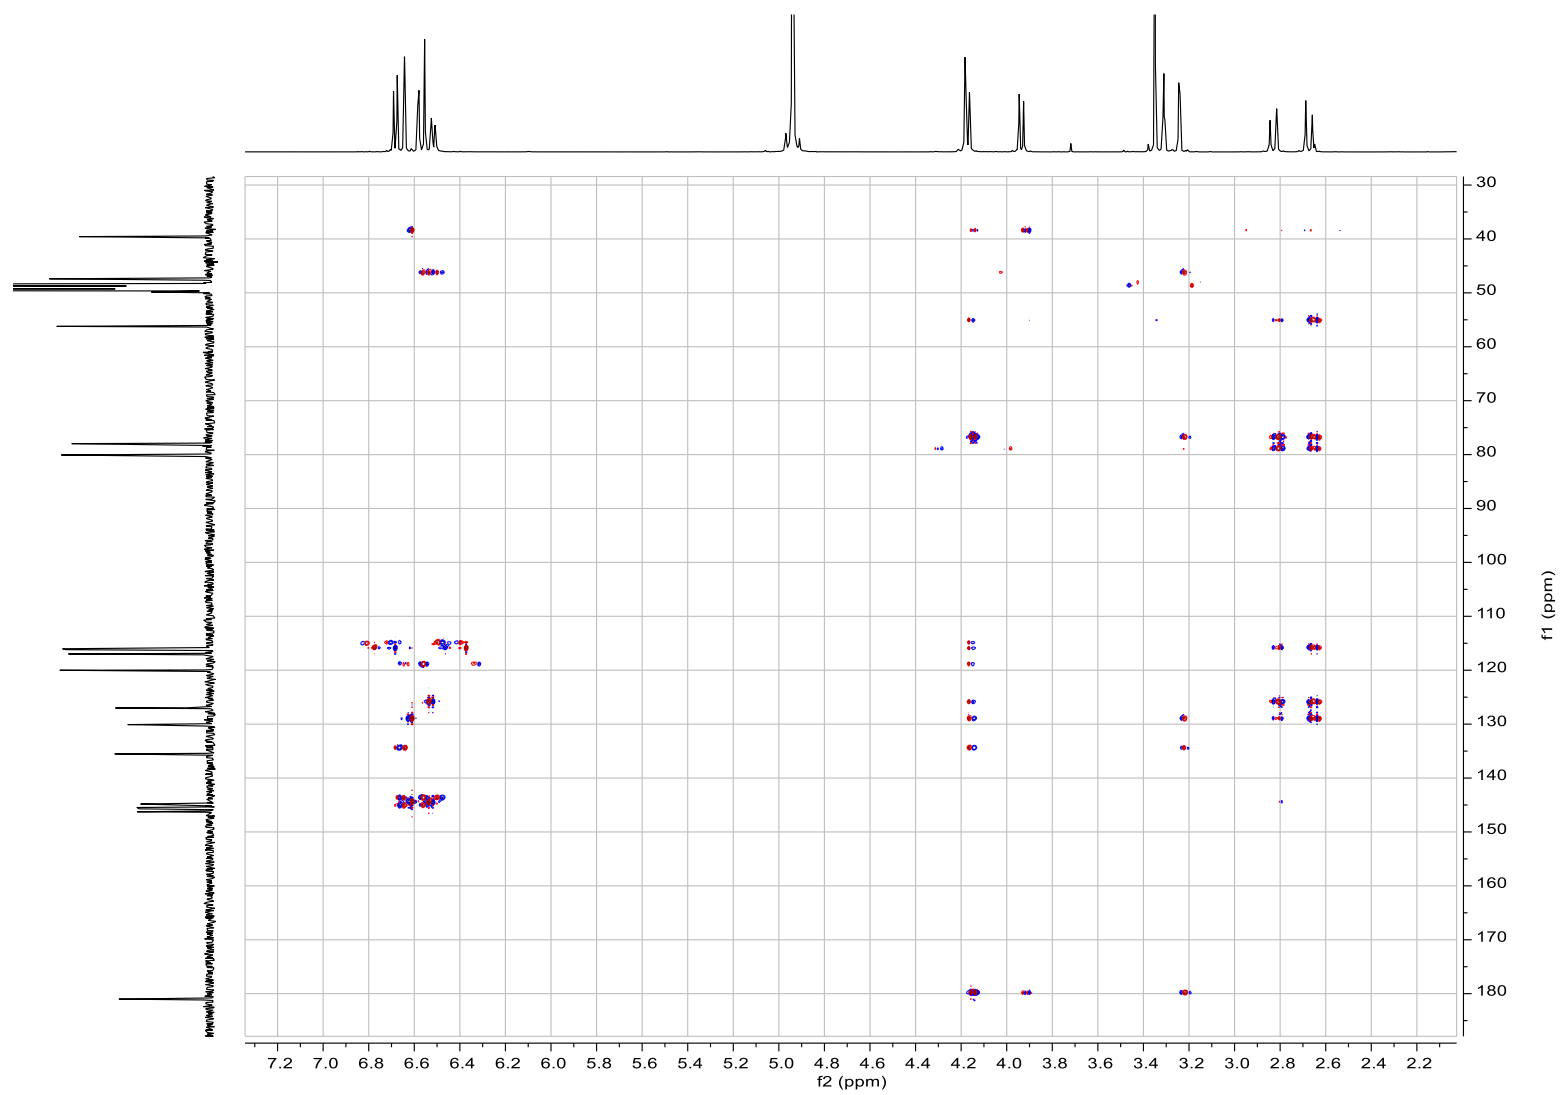

Figure S13. The HMBC spectrum of compound 2 in CD<sub>3</sub>OD.

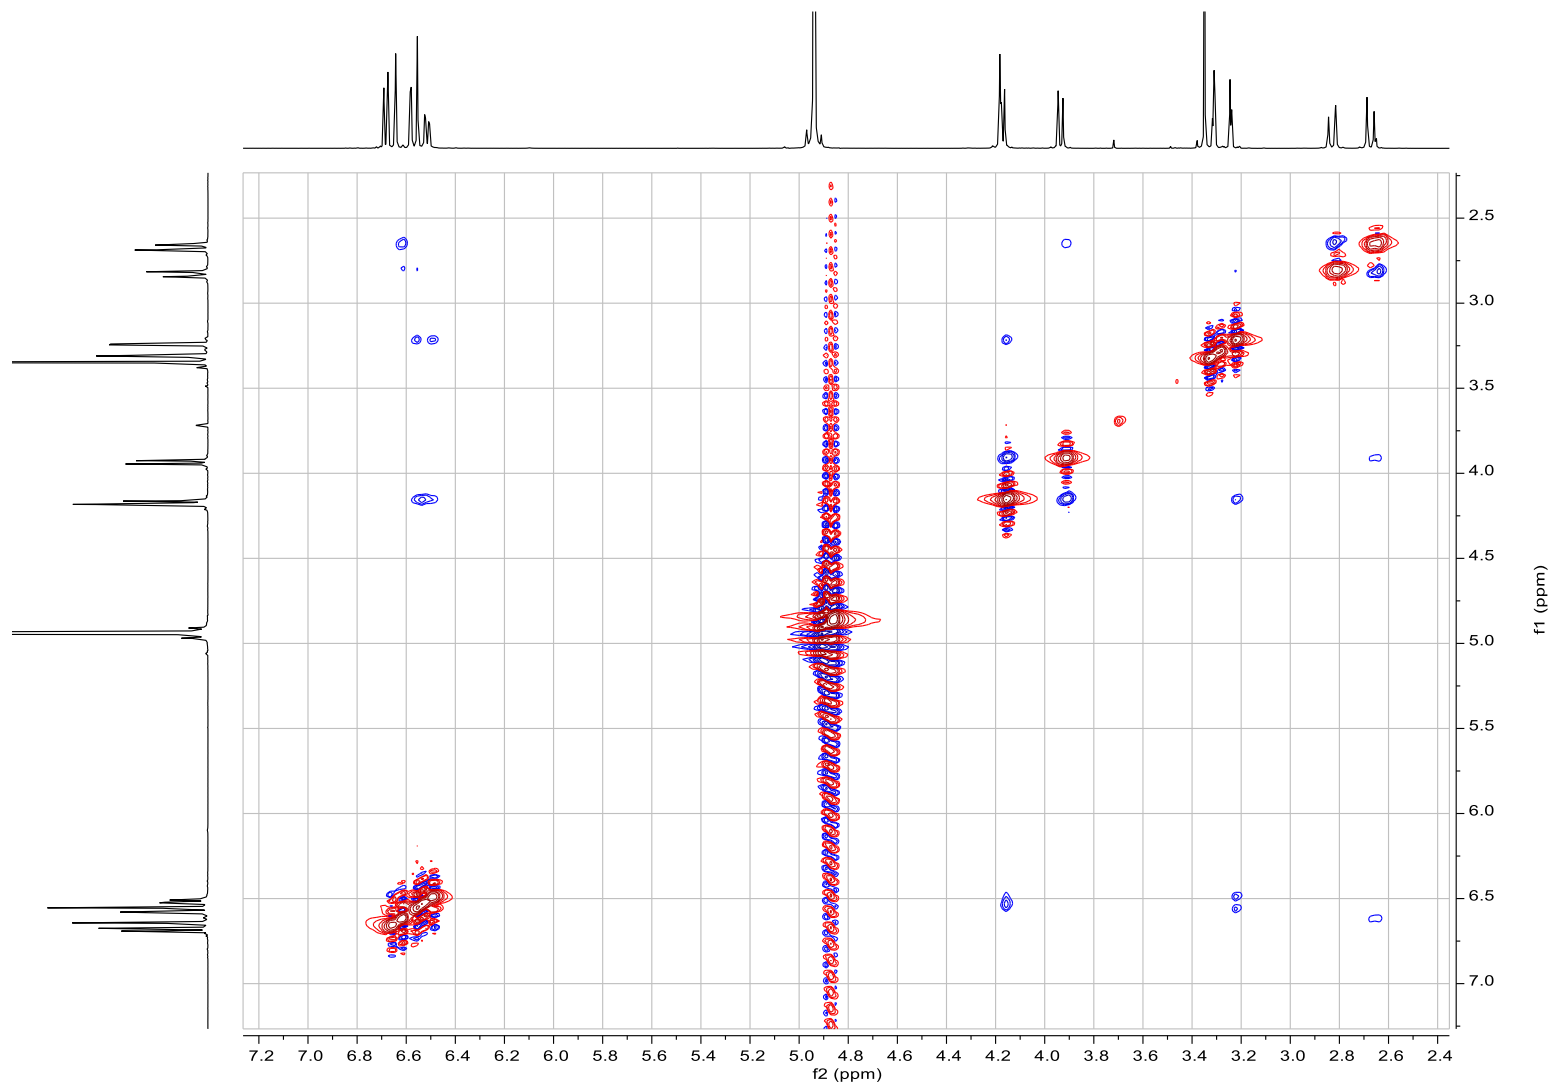

Figure S14. The NOESY spectrum of compound 2 in CD<sub>3</sub>OD.

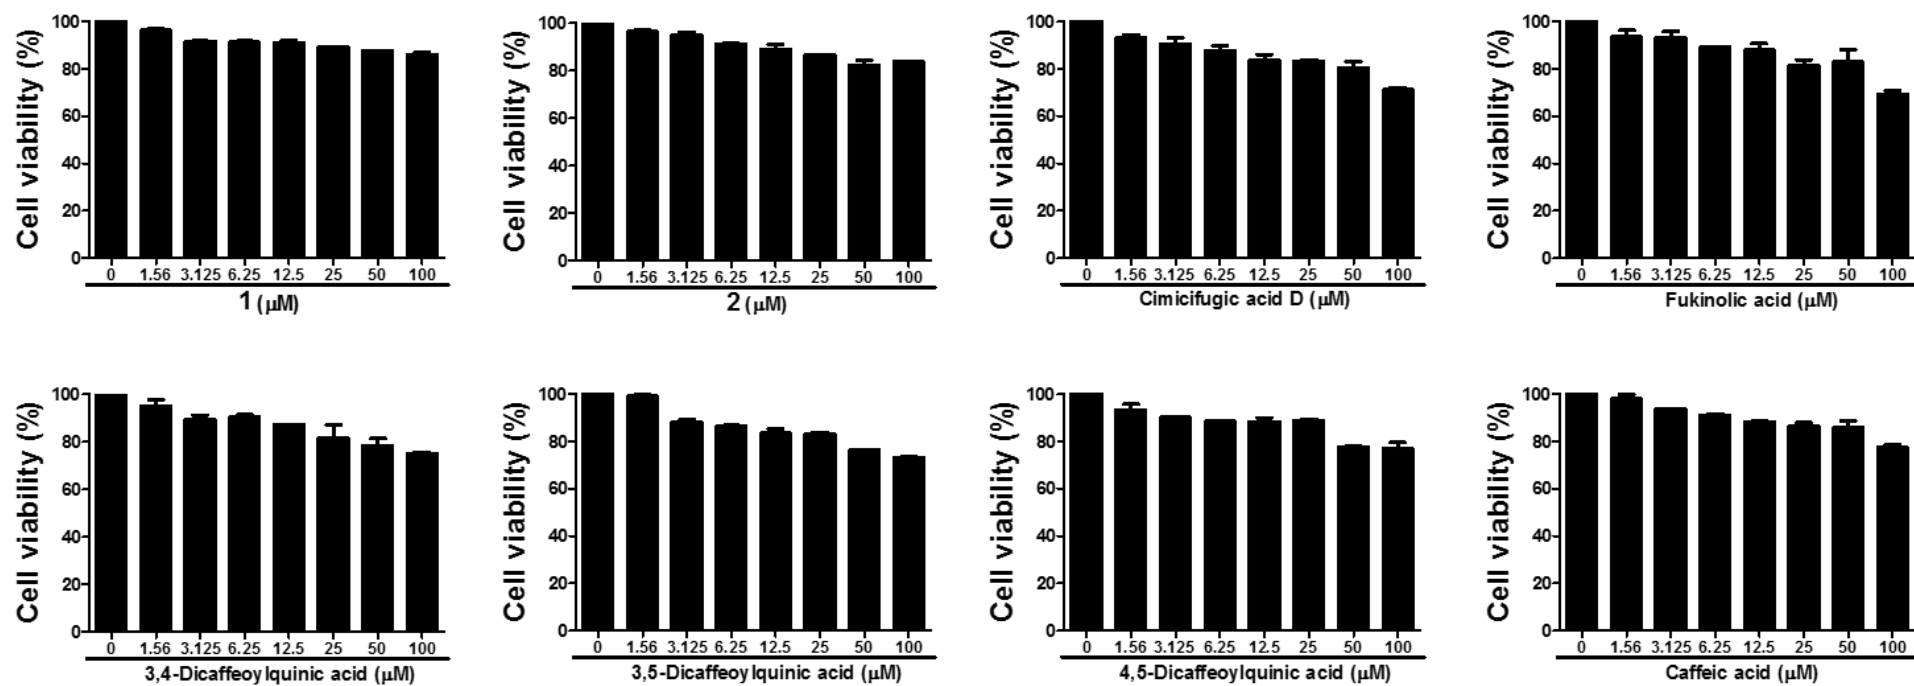

Figure 15. Cell viability of the isolates from *P. japonicus*.
